# 1 High carnivore population density highlights the 2 conservation value of industrialised sites

3 Daan J. E. Loock<sup>a\*</sup>, Samuel T. Williams<sup>b,c\*</sup>, Kevin W. Emslie<sup>b</sup>, Wayne S. Matthews<sup>d</sup>, Lourens H.  
4 Swanepoel<sup>b</sup>

5 <sup>a</sup>Faculty of Natural and Agricultural Sciences, University of the Free State, 205 Nelson Mandela  
6 Drive, Park West, Bloemfontein, 930, South Africa

7 <sup>b</sup>Department of Zoology, School of Mathematical & Natural Sciences, University of Venda,  
8 Private Bag X5050, Thohoyandou, 0950, South Africa

9 <sup>c</sup>Department of Anthropology, Durham University, Durham, DH1 3LE, United Kingdom

10 <sup>d</sup>Department of Environmental Sciences, College of Agriculture & Environmental Sciences,  
11 University of South Africa, P.O. Box 392, Pretoria, 0003, South Africa

12 \*These authors contributed equally to this work, and are listed in alphabetical order

13

14 **Word count:** Total: 6,267; tables and figures: 220; references: 2,204

15 **Keywords:** anthropocene, abundance, carnivore, felidae, private land

## 16 **1. Abstract**

17 As the environment becomes increasingly altered by human development, the importance of  
18 understanding the ways in which wildlife interact with modified landscapes is becoming clear.  
19 Areas such as industrial sites are sometimes presumed to have little conservation value, but many  
20 of these sites have areas of less disturbed habitats around their core infrastructure, which could  
21 provide ideal conditions to support species such as mesocarnivores. We conducted the first  
22 assessments of the density of serval (*Leptailurus serval*) at the Secunda Synfuels Operations plant,  
23 South Africa. We ran three camera trap surveys to estimate serval density using a spatially explicit  
24 capture recapture framework. Servals occurred at densities of 62.33-111.55 animals per 100 km<sup>2</sup>,  
25 which are the highest recorded densities for this species. Our findings highlight the significant  
26 conservation potential of industrialised sites, and we suggest that such sites could help contribute  
27 towards meeting conservation goals.

28

## 29 **2. Introduction**

30 Over the last centuries, there have been rapid and intense environmental changes caused by  
31 increasing human numbers, technological advances and industrialisation (United Nations  
32 Environment Programme 2012). Human alterations on the environments have resulted in a decline  
33 in biodiversity, and are elevating extinction rates of species at a global scale (Chapin et al. 2000).  
34 Currently more than 75% of the terrestrial surface is impacted by humans (Ellis et al. 2010; Ellis

35 et al. 2013). These human activities are affecting biodiversity and ecosystems on various scales as  
36 well as modifying existing ecosystems, creating unique urban environments (Williams et al. 2009;  
37 Barbosa et al. 2010). In many cases biodiversity can be positively related to human population at  
38 a regional scale due, for instance, to an enhanced spatial heterogeneity between rural and urban  
39 environments, and the introduction of exotic species (McKinney 2002; Sax and Gaines 2003). The  
40 influence of these modifications depends on both the scale and the organisms involved (Barbosa  
41 et al. 2010).

42 Even within the most densely populated and intensively used areas, including urban landscapes,  
43 humans rarely utilise all land, and tend to retain significant green or unused areas. These “green  
44 spaces” hold ecological potential, and can reduce biodiversity loss by managing habitats to support  
45 endangered species (Jackson et al. 2014), although further research is necessary to understand the  
46 impacts of these processes (Northrup and Wittemyer 2013).

47 One species that that could be impacted by development is the serval (*Leptailurus serval*). The  
48 serval is a medium-sized carnivore that feeds primarily on rodents (Ramesh and Downs 2015), and  
49 is dependent on wetland habitats (Ramesh and Downs 2015/2) that are being rapidly lost globally  
50 (Dixon et al. 2016). The species is listed as Least Concern on the global IUCN Red List of  
51 threatened species (Thiel 2015), but is considered Near Threatened in South Africa (Friedmann  
52 and Daly 2004). Serval have declined throughout their range (Ramesh and Downs 2013), and the  
53 principal threats to the species are loss and degradation of their wetland habitat (Thiel 2011), trade  
54 of their skins (Kingdon and Hoffmann 2012), and persecution in response to perceived predation

55 of poultry (Henley 1997), although they only rarely prey on livestock (Thiel 2015). Data on  
56 population density and structure are critical to planning wildlife management and implementing  
57 conservation initiatives (Barrows et al. 2005), but there have been few studies on serval ecology,  
58 and conservation initiatives are hindered by poor knowledge of abundance (Ramesh and Downs  
59 2013).

60 In this study, we firstly aimed to estimate the population density of servals at the Secunda Synfuels  
61 Operations plant, an industrial site in Mpumalanga province, South Africa, that includes natural  
62 wetland within its boundaries (Fig. 1). We also aimed to assess the structure of this serval  
63 population, in order to make inferences about population dynamics.

64

65

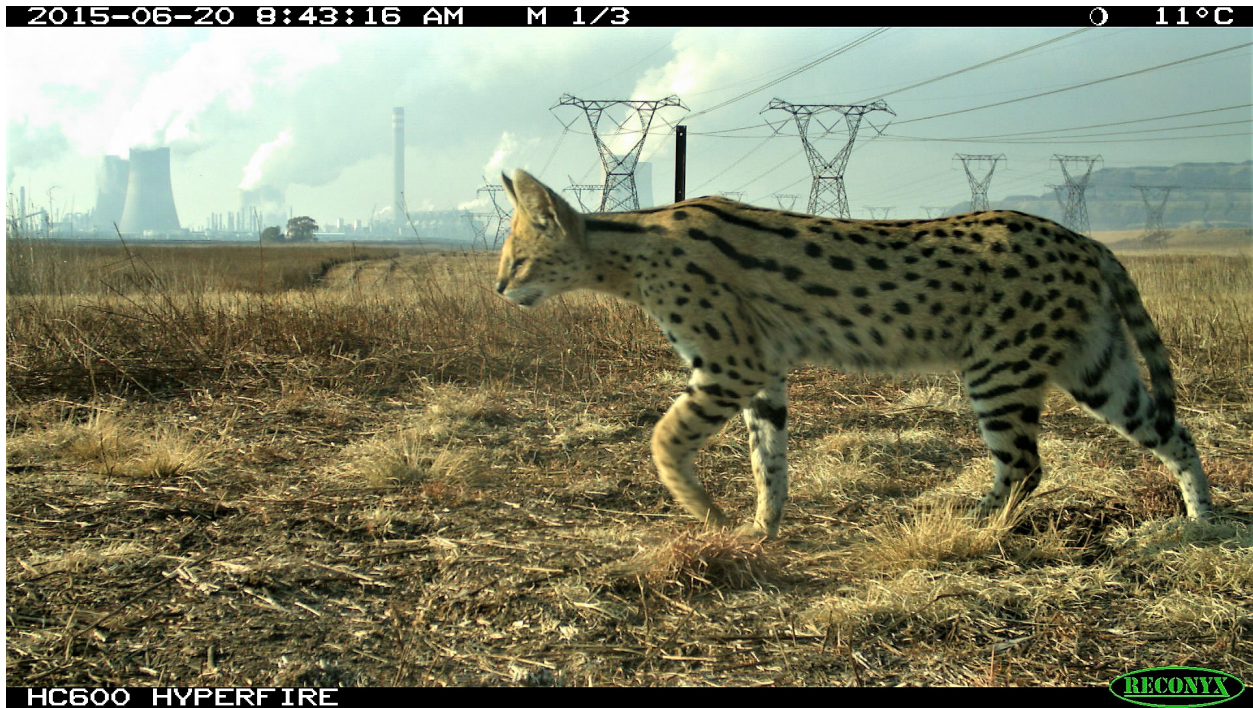

66

67 Fig. 1. Camera trap image of a serval at the heavily industrialised Secunda Synfuels Operations  
68 plant in South Africa, recorded by Reconyx Hyperfire HC600 camera.

69

### 70 **3. Materials and Methods**

#### 71 **3.1. Ethics statement**

72 This project is registered at the Animal Care and Use Committee of the University of Pretoria  
73 (Ethical clearance number: EC040-14) and the Mpumalanga Tourism and Parks Agency (Permit  
74 number: 5467).

### 75 3.2. Study Area

76 The Secunda Synfuels Operations Division of Sasol South Africa (PTY) Ltd, plant is located in  
77 Secunda, Mpumalanga province, South Africa (Fig. 2), and it consists of a primary area (a  
78 petrochemical plant) and a secondary area (which is made up of surrounding natural and disturbed  
79 vegetation). The secondary area (hereafter referred to as the SSO) covers an area of 50 km<sup>2</sup> (central  
80 coordinates 26°31'45.62" S, 29°10'31.55" E). The secondary area is a gently to moderately  
81 undulating landscape on the Highveld plateau, supporting short to medium-high, dense, tufted  
82 grasses at different levels of disturbance. In places, small scattered wetlands (both man-made and  
83 natural), narrow stream alluvia, and occasional ridges or rocky outcrops interrupt the continuous  
84 grassland cover. Much of the study site (38%) is classified as relatively untransformed habitat,  
85 which is managed in accordance to Secunda Synfuels Operations Biodiversity Management Plan,  
86 to conserve the natural areas from degradation and improve the ecological functionality of the  
87 disturbed land. The vegetation type is classified as Soweto Highveld Grassland (Rutherford et al.  
88 2006), and the area falls into the Grassveld Biome (Mucina and Rutherford 2006). We used  
89 satellite images (Google 2014) to digitise the boundaries of four major habitat types (Disturbed,  
90 Grassland, Grass & wetland, and Wetland), which we used as site covariates in subsequent  
91 analyses.

92 The relatively unspoiled grassland represents the best form of Soweto Highveld Grassland on site.  
93 The characteristic species include *Cymbopogon pospischilii*, *Pollichia campestris*, *Walafrida*  
94 *densiflora*, *Eragrostis chloromelas*, *Gomphrena celosioides*, *Craibia affinis* and *Cineraria cf.*

95 *savifraga* (Matthews 2016). The grassland habitat has a low basal cover due to grazing and during  
96 the rainy season the grass phytomass averages around 3-4 tons per hectare (de Wet 2016). The  
97 grass and wetland habitat occurs mostly within the transition zones or dry floodplains not typical  
98 of either wetland habitat or grassland habitat. These areas have a medium cover, and include some  
99 species typical to wetlands. The wetland habitat is dominated by species indicative of wetland  
100 zones and moist soils (Linström 2012). The phytomass here can be in excess of 5 tonnes per  
101 hectare, and the growth is up to 1.5 meters above the ground level. The disturbed habitat is  
102 dominated by weedy forbs with medium to very high density. The impact of the weedy forbs is a  
103 thicket of basal cover on the surface and up to 1.5 meters above ground level.

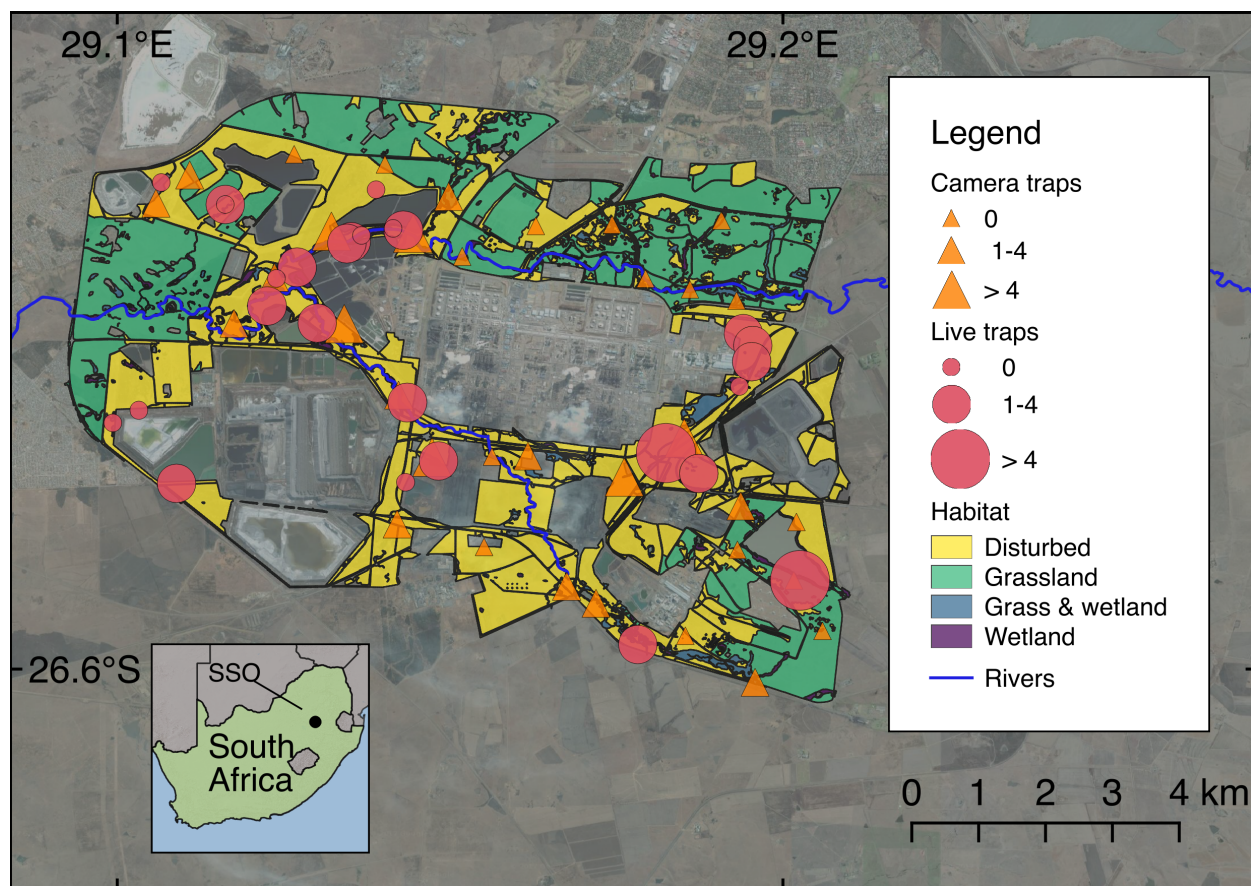

104

105 Fig. 2. Map showing the locations of camera traps and live traps at the Secunda Synfuels  
106 Operations plant in South Africa. The size of points representing camera traps and live traps  
107 diameter is proportional to the number of individual serval captured. Major habitat types are also  
108 shown, along with satellite images illustrating the human-modified landscapes. Wetland and Grass  
109 & wetland habitat types are difficult to visualise at this scale as they occur in very close proximity  
110 to rivers.

111



### 112 3.3. Camera trapping

113 The study was underpinned by spatially explicit capture-recapture (SECR) framework. We  
114 established an array of Reconyx Hyperfire HC600 camera traps at 34 camera trap stations over an  
115 area of 79.4 km<sup>2</sup> throughout the study site (Fig. 2). We separated camera traps with an average of  
116 1.2 km (maximum 2.1 km), which was based on the home range size of serval (Ramesh et al.  
117 2015). The study area of 79.4 km<sup>2</sup> is approximately two to three times the maximum area of serval  
118 home range (Bowland 1990). The camera trapping area is therefore adequate (greater than the  
119 home range size of male serval) to allow for robust density estimates using SECR framework  
120 (Tobler and Powell 2013).

121 We placed camera traps on game trails and roads to maximise the probability of photographing  
122 servals, and to facilitate access for camera maintenance. We mounted camera traps on fence posts,  
123 50 cm above the ground and 1 to 2 m from the trail. Vegetation in front of the camera traps was  
124 cleared to reduce the rate of false triggers of the motion detector.

125 We conducted three surveys from 2014 to 2015, with each survey running for 40 days (see Table  
126 1 for dates). Camera traps were programmed to operate 24 hours per day, with a one minute delay  
127 between detections. Camera trap positions were kept constant within each survey and between  
128 surveys. We visited each camera trap on a weekly basis to download the images, change batteries,  
129 and ensure the cameras remained in working order. Camera Base 1.4 (Tobler 2010) was used to  
130 manage the images collected by the camera traps. We identified servals manually using individual

131 markings such as spot patterns and scars.

132

### 133 3.4. Live trapping

134 Live trapping formed part of a larger study investigating serval spatial and disease ecology. We  
135 used the live trapping data to record the capture rate and population structure of the serval  
136 population at the study site to validate our camera trapping study. Servals were trapped using 16  
137 steel trap cages measuring 200 cm x 80 cm x 80 cm, deployed at 29 trap sites throughout the study  
138 site. Traps were baited with helmeted guineafowl (*Numida meleagris*) for a total of 287 trap nights  
139 between 2014 and 2017. Servals were immobilised by a veterinarian using one of the following  
140 drug combinations: 1) KBM-5: ketamine (5.0 mg kg<sup>-1</sup>), butorphanol (0.2 mg kg<sup>-1</sup>), and  
141 medetomidine (0.08 mg kg<sup>-1</sup>); 2) KBM-8: ketamine (8.0 mg kg<sup>-1</sup>), butorphanol (0.2 mg kg<sup>-1</sup>), and  
142 medetomidine (0.08 mg kg<sup>-1</sup>); 3) ZM: zoletil (5.0 mg kg<sup>-1</sup>) and medetomidine (0.065 mg kg<sup>-1</sup>); 4)  
143 AM: alfaxalone (0.5 mg kg<sup>-1</sup>) and medetomidine (0.05 mg kg<sup>-1</sup>); or 5) ABM: alfaxalone (2.0 mg  
144 kg<sup>-1</sup>), butorphanol (0.2 mg kg<sup>-1</sup>), and medetomidine (0.08 mg kg<sup>-1</sup>) (Blignaut et al. in review).  
145 Drugs were administered intramuscularly using a blowpipe. If serval showed signs of inadequate  
146 drug dosages, they were topped-up with the same combinations. Where administered,  
147 medetomidine and butorphanol were pharmacologically antagonised with atipamezole (5 mg mg<sup>-1</sup>  
148 <sup>1</sup> medetomidine) and naltrexone (2 mg mg<sup>-1</sup> butorphanol), respectively. After examination, animals  
149 were released at the same site where they were captured.

150 Animals with a mass of 3-8 kg were considered to be juveniles (up to approximately six months  
151 old, to the stage where the canines are developed). Servals with a mass of 8-11 kg were categorised  
152 as sub-adults (6-12 months old, just before they are sexually mature). Animals 11-15 kg  
153 (approximately 12 to 18 months and older) were considered to be adults (Sunquist and Sunquist  
154 2002).

155

### 156 3.5. Data analysis

157 We estimated serval density by fitting likelihood based SECR (Efford 2004) models to camera  
158 trap data using the package secr (Efford 2017) in R version 3.4.3 (R Development Core Team  
159 2017). The advantage of SECR models over traditional density estimation methods is that they do  
160 not require the use of subjective effective trapping areas, and instead estimate density directly  
161 (Tobler and Powell 2013). This is achieved by estimating the potential animal activity centres in a  
162 predefined area using spatial location data from the camera traps (Efford 2004). The spacing of  
163 the activity centres is related to the home range size of the animals, and as such the detection  
164 probability of each animal is a function of the distance from the camera trap to the activity centre.  
165 Detection is modelled using a spatial detection function which is governed by two parameters; the  
166 encounter rate at the activity centre (detection probability;  $\lambda_0$ ) and a scale parameter ( $\sigma$ ) which  
167 describes how the encounter rate declines with increased distance from the activity centre (Efford  
168 2004). We tested for three different spatial detection functions; half-normal, hazard and

169 exponential. We ranked models based on Akaike information criterion (AIC), and found  
170 overwhelming support for the hazard rate spatial detection function (Table S1). All subsequent  
171 models were fitted with the hazard rate detection function.

172 We fitted SECR models by maximising the full likelihood where the scale parameter was kept  
173 constant, but we let the encounter rate vary by biologically plausible hypotheses. The scale  
174 parameter is largely affected by home range size, and hence the sex of the animal (Sollmann et al.  
175 2011/3). However, we were unable to determine the sex of individual serval from the photographs,  
176 and could therefore not model variation in the scale parameter. We first fitted a model in which  
177 serval showed a behavioural response at  $\lambda_0$ , as animals can become trap happy or trap shy (Wegge  
178 et al. 2004). Secondly, we tested the effect of habitat on  $\lambda_0$ , as serval prefer wetlands (Bowland  
179 1990), which would result in higher detections in these habitats. We captured camera-specific  
180 habitat variables from the vegetation classification. Thirdly, we coded each year and season as a  
181 separate session, and used the multi-session framework in `secr` to test the effect of season on serval  
182 density, with constant  $\lambda_0$ . We lastly fitted a model in which  $\lambda_0$  varied with both season and habitat  
183 type. These models were contrasted against a null model, in which all variables were kept constant.

184 We used AIC to rank models, considering models with  $\Delta\text{AIC} < 2$  to have equal support (Burnham  
185 and Anderson 2004). The buffer width for analysis was set at 3,000 m, which resulted in the  
186 inclusion of an informal housing settlement and a residential area in the state space buffer. Since  
187 it is highly unlikely that serval will utilise these areas (as well as the primary industrial area) we  
188 excluded these areas from the state space buffer (Fig. S1). All data and R code used for analysis

189 are available in (Loock et al. 2018).

190

## 191 **4. Results**

### 192 **4.1. Camera trapping**

193 During a camera trapping effort of 3,590 trap days, we photographed a total 61 serval spanning  
194 three separate sessions (Table 1). The number of individual serval captures did not differ greatly  
195 between sessions, although the highest number was captured during the wet period of 2015 (Table  
196 S3, Fig. S2).

197 The two most parsimonious SECR models ( $\Delta AIC < 2$ ) both indicated that the encounter rate  
198 ( $\lambda_0$ ) was affected by habitat type (Table S4). There was also strong support that serval density is  
199 session dependant ( $\Delta AIC = 0.098$ ;  $\phi = 0.487$ ; Table S3). To estimate serval density we therefore  
200 fitted an SECR model with density dependent on session (a proxy for season and year combination)  
201 and encounter rates dependent on habitat type. Serval population density estimates at SSO varied  
202 from 62.33 (SE=16.03) to 111.55 (SE=22.76) animals per 100 km<sup>2</sup> (Fig. 3a). Highest estimates  
203 were recorded during the dry seasons (Winter 2014: 111.55 [SE=22.76] and Winter 2015: 103.06  
204 [SE=21.76]) compared to the single summer season (Summer 2015: 62.33 [SE=160.3]; Fig. 3a).  
205 Vegetation type had a significant effect on serval encounter rates, where grassland had the lowest  
206 encounter rate (0.04 [SE=0.01]) compared to wetlands with the highest (0.19 [SE=0.03]; Fig. 3b).

207 Table 1. Details of serval camera trapping surveys conducted at SSO in Mpumalanga province,  
208 South Africa, in 2014 and 2015.

| <b>Survey</b> | <b>Starting date</b> | <b>End date</b> | <b>Camera trap nights</b> | <b>Survey area (km<sup>2</sup>)</b> | <b>Number of serval photographic captures</b> | <b>Number of individual serval photographed</b> |
|---------------|----------------------|-----------------|---------------------------|-------------------------------------|-----------------------------------------------|-------------------------------------------------|
| Winter 2014   | 2014/08/05           | 2014/09/14      | 1,105                     | 79.4                                | 332                                           | 22                                              |
| Summer 2015   | 2015/02/21           | 2015/04/02      | 1,333                     | 79.4                                | 580                                           | 34                                              |
| Winter 2015   | 2015/06/20           | 2015/07/30      | 1,152                     | 79.4                                | 672                                           | 31                                              |
| <i>Total</i>  |                      |                 | <i>3,590</i>              | <i>79.4</i>                         | <i>1,584</i>                                  | <i>61</i>                                       |

209

210

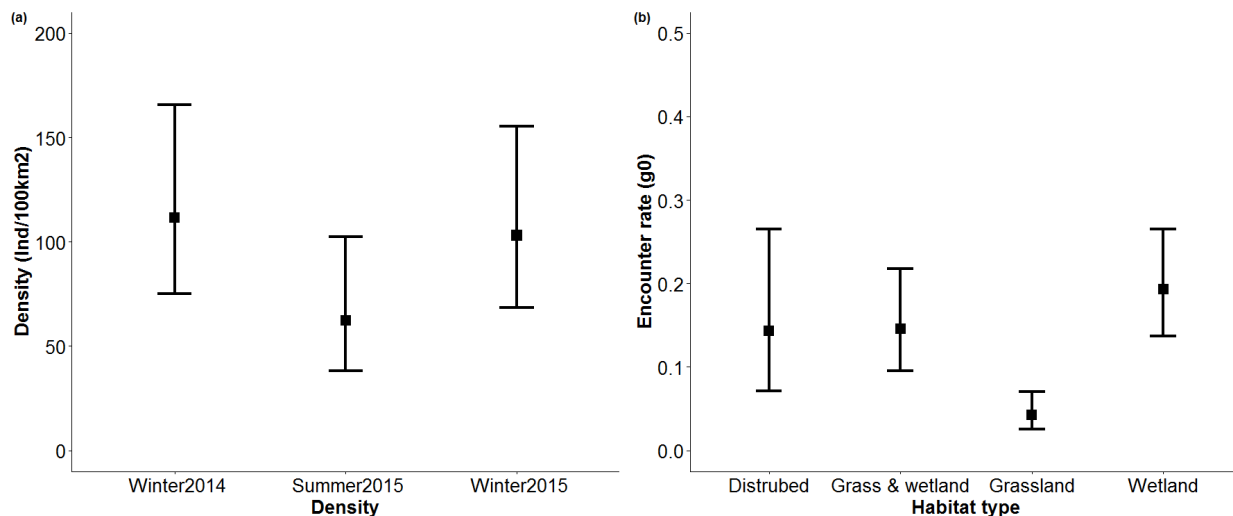

211  
212 Fig. 3. Serval density estimates for each camera trap survey conducted at SSO indicating a)  
213 influence of season on density, and b) effect of habitat type on serval encounter rate.

214

#### 215 4.2. Live trapping

216 We captured 65 individuals, of which four were also recaptured on a second occasion. This  
217 comprised of a total of 26 adult males, 19 adult females, 11 sub-adults, and seven juvenile animals.  
218 This resulted in a mean trapping success rate of 0.21 captures per trap night (excluding recaptures).  
219 Trapping success rate varied little between sessions (Fig. 4).

220

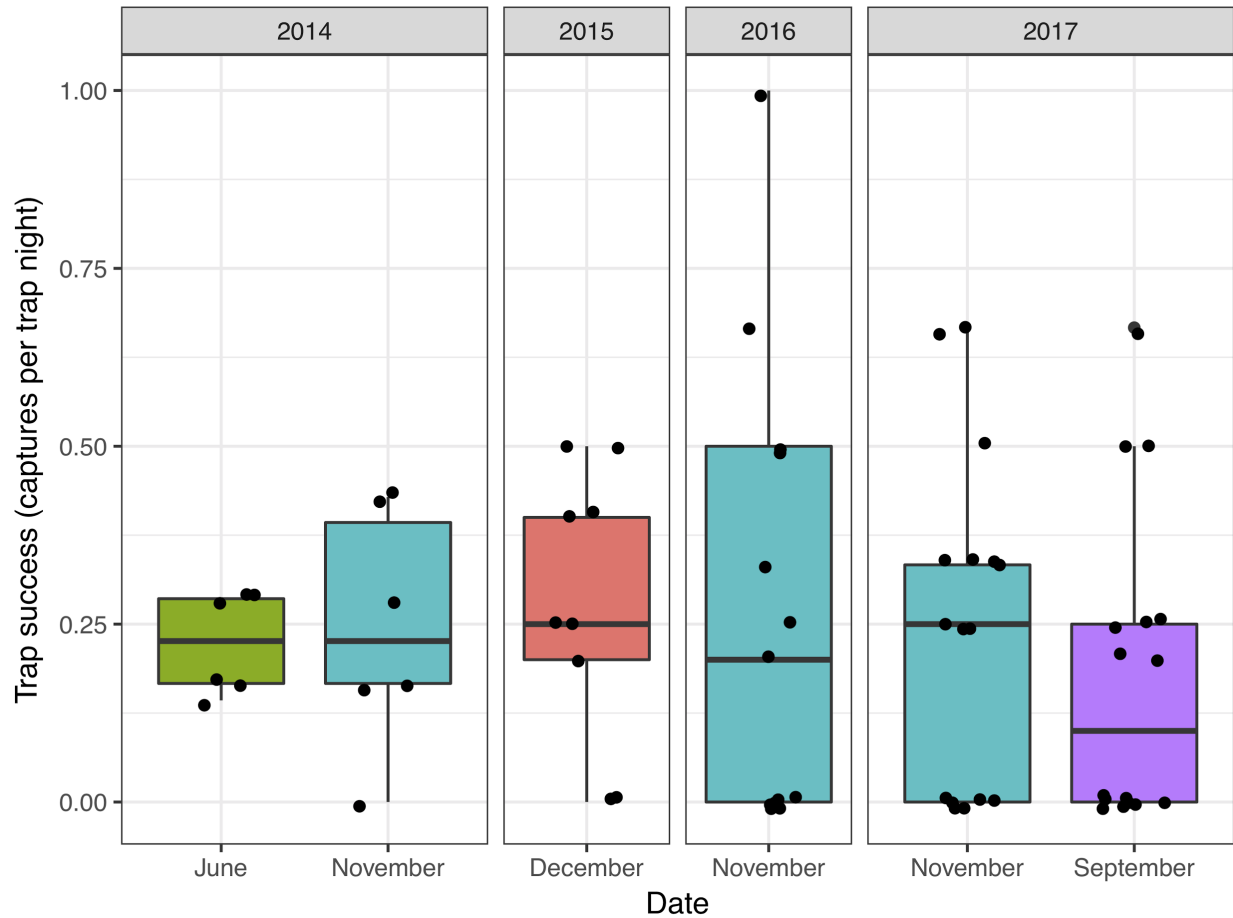

221

222 Fig. 4. Box plot showing trap success rate for serval captures at SSO from 2014 to 2017.

223

## 224 5. Discussion

### 225 5.1. Comparative serval density

226 In our three camera trap surveys at SSO, we estimated serval population density to be 111.55,



227 62.33, and 103.06 animals per 100 km<sup>2</sup>, which are the highest densities recorded in the literature.  
228 Although there are no data available for serval live trapping rates, rates of 0.0015-0.017 captures  
229 per trap night are much more typical for other mesocarnivores such as jaguarundi (*Puma*  
230 *yagouaroundi*), oncilla (*Leopardus tigrinus*), tayra (*Eira barbara*), and feral cat (*Felis silvestris*  
231 *catus*) using cage traps (Molsher 2001; Michalski et al. 2007; McGregor, H W, Hampton J O,  
232 Lisle, D, Legge, S 2016), which are an order of magnitude lower than serval live capture rates at  
233 SSO (0.21 captures per trap night). Although great care must be taken when comparing trapping  
234 rates between different locations and species, the live trap rates at SSO nevertheless appear to be  
235 consistently very high, which supports the high population densities estimated using camera trap  
236 data.

237 Our high estimates of serval densities at SSO contrast with more typical densities reported in  
238 Luambe National Park in Zambia (9.9 animals per 100 km<sup>2</sup> (Thiel 2011), Bwindi Impenetrable  
239 National Park in Uganda (9 animals per 100 km<sup>2</sup> (Andama 2000, cited in Kingdon and Hoffmann  
240 2012)), and on farmland in the Drakensberg Midlands, South Africa (6.5 animals per 100 km<sup>2</sup>  
241 (Ramesh and Downs 2013)). However, there is evidence that serval can attain such high densities.  
242 For example, Geertsema (1985) reported a serval density of 41.66 animals per 100 km<sup>2</sup> in the  
243 Ngorongoro Crater, Tanzania.

244 High population densities of other carnivore species have also been reported in human-modified  
245 habitats such as urban areas. Coyotes (*Canis latrans*), raccoons (*Procyon lotor*), red foxes (*Vulpes*  
246 *vulpes*), and Eurasian badgers (*Meles meles*), for example, all thrive in urban landscapes (Bateman

247 and Fleming 2012; Scott et al. 2014). Carnivore species able to adapt to urban environments often  
248 succeed in these areas due to high food availability, favourable climatic effects, and the reduced  
249 threat of intraguild predation because of the absence of larger apex predators (Fuller et al. 2010).  
250 We provide several, not necessarily mutually exclusive theories, to explain the high serval density  
251 we observed at SSO.

252 Firstly, servals in the SSO are protected from persecution. Such persecution can have large effects  
253 on carnivore densities. For example leopards (*Panthera pardus*) in livestock/game farming areas  
254 only attain around 20% of their potential density compared to protected areas free from persecution  
255 (Balme et al. 2010). Servals outside protected areas are frequently persecuted by livestock farmers  
256 (Henley 1997) as they are often mistakenly blamed for livestock predation (Skinner and Chimimba  
257 2005), but at SSO this is not the case, which could lead to higher population densities (Cardillo et  
258 al. 2004). Secondly, servals are the largest remaining carnivore species occurring at ecologically  
259 effective densities at SSO, so there is little interspecific competition from larger carnivores. In  
260 other areas, the presence of other medium- and large-bodied carnivores could otherwise limit  
261 serval population densities (through intraguild predation), so their absence can lead to  
262 mesopredator release, such as through increased survival of young (Ritchie and Johnson 2009).  
263 For example, the absence of large carnivores such as lions (*Panthera leo*) and spotted hyaenas  
264 (*Crocuta crocuta*) in northern South Africa is thought to have led to the competitive release of  
265 cheetahs (*Acinonyx jubatus*) (Marnewick et al. 2007). Thirdly, the abundance of disturbed habitat  
266 at SSO could also facilitate high serval population density. Disturbed habitat can be highly

267 productive (Williams et al. 2018), and provide shelter and food resources for species such as  
268 rodents that serval prey upon (Taylor 2013), providing abundant food and in turn supporting a high  
269 abundance of serval.

270 Although the population density of serval recorded at SSO was exceptionally high, the structure  
271 of this serval population was similar to those at other sites. The number of adult males per 100  
272 adult females captured in live traps at SSO was 137, which is within the range reported in the  
273 literature (50-220 in KwaZulu-Natal ((Bowland 1990; Ramesh et al. 2016); 100 in the Ngorongoro  
274 Crater, Tanzania (Geertsema 1985)). Similarly, the proportion of the population at SSO that was  
275 comprised of juvenile and sub-adult individuals (0.69) was very similar to other populations (0.64  
276 in the Ngorongoro crater; (Geertsema 1985)). It therefore appears that although the serval  
277 population density at SSO is very high, the structure of the population is not unusual, which is not  
278 indicative of a rapidly declining or increasing population size (Harris et al. 2008), supporting our  
279 findings that the serval population density at the study site appears to be relatively stable.

280 Although servals appear to thrive in close proximity to such a heavily industrialised site, we  
281 suggest that further research is conducted to identify any potential effects of industrial activity  
282 (Raiter et al. 2014), such as the influence of noise and air pollution on the physiology and  
283 behaviour of wildlife in the vicinity (Morris-Drake et al. 2017).

284

## 285           5.2.    The impacts of modified landscapes

286    In recent years the expansion of infrastructure has progressed more rapidly than during any other  
287    period in history (Laurance et al. 2015), and industrial sites such as mines and fossil fuel processing  
288    plants are not the only developments that could have impacts on wildlife. The growing road  
289    network, for example (Ibisch et al. 2016), has large direct and indirect ecological impacts such as  
290    causing wildlife-vehicle collisions, polluting the environment, disrupting animal migrations and  
291    gene flow, and providing access to invading species and humans, facilitating further degradation  
292    (Laurance et al. 2009; Sloan et al. 2016). The rapidly growing number of hydroelectric dams (Zarfl  
293    et al. 2014) increases the risk of habitat fragmentation through deforestation, in addition to  
294    disrupting freshwater ecosystems (Finer and Jenkins 2012). Similarly, the development of urban  
295    and agricultural areas fragments and destroys habitats (Ripple et al. 2014). Consequently,  
296    delineating how the changing environment affects biodiversity will be an increasingly important  
297    theme of future research.

298    But not all the impacts of anthropogenic development on wildlife are negative. The high serval  
299    densities at SSO are remarkable as the site is very heavily industrialised. Nature reserves and  
300    exclusion zones surrounding industrialised areas such as SSO have the potential to balance  
301    resource utilisation with biodiversity conservation (Edwards et al. 2014). Some industrial  
302    installations such as mines have created nature reserves, which can benefit biodiversity  
303    conservation. The Mbalam iron ore mine in Cameroon has set aside land to protect rare forest  
304    mammals (Edwards et al. 2014). Private nature reserves created around the Venetia diamond mine

305 in South Africa and the Jwaneng diamond mine in Botswana support a broad complement of large  
306 mammals including elephants (*Loxodonta africana*), lions (*Panthera leo*), leopards (*Panthera*  
307 *pardus*), cheetahs, African wild dogs (*Lycaon pictus*), brown hyaenas (*Hyaena brunnea*), and  
308 black-backed jackals (*Canis mesomelas*) (Smallie and O’connor 2000; Kamler et al. 2007; Houser  
309 et al. 2009; Jackson et al. 2014). The Sperrgebiet exclusion zone in Namibia, established to protect  
310 diamond deposits (Edwards et al. 2014), has now been proclaimed a National Park (Wiesel 2010).  
311 The consequent changes in the ecological functions of these human modified areas can produce a  
312 new combination of species, sometimes modifying and, in many cases, increasing the local  
313 richness (Hobbs et al. 2006; Pautasso et al. 2011).

314 Studies such as this highlight the complexity of the relationship between wildlife and the human-  
315 modified environment, and suggest that the potential conservation value of industrialised sites  
316 should not be overlooked. This underscores the importance of sound ecological management in  
317 these areas. Such sites could be incorporated into wildlife management plans, and could help to  
318 achieve goals such as the conservation of threatened species. This could be achieved, for example,  
319 through the formation of partnerships between industry and the non-profit sector or governmental  
320 agencies, such as the partnership between Eskom and the Endangered Wildlife Trust (EWT) to  
321 reduce the threats posed by electricity infrastructure to wildlife in South Africa (Jenkins et al.  
322 2010).

323

## 324 **6. Conclusion**

325 Servals occur at much greater densities at SSO than have been recorded elsewhere. Capture rates  
326 on both camera traps and live traps were remarkably high. High densities may be due to favourable  
327 conditions such as a high abundance of rodent prey and the absence of persecution or competitor  
328 species. Despite the highly industrialised nature of the site, serval population structure appears to  
329 be similar to other natural sites. We suggest that the potential value of industrial sites, where they  
330 include areas of relatively natural habitats, may be underappreciated by conservationists, and that  
331 these sites could help meet conservation objectives.

332

## 333 **Acknowledgements**

334 We would like to thank Secunda Synfuels Operations > Div of Sasol South Africa (Pty) Ltd. for  
335 supporting this research, the Faculty of Natural and Agricultural Science, University of the Free  
336 State, and the Wildlife Resource Association (WRA).

337

## 338 **References**

339 Balme, G. A., R. Slotow, and L. T. B. Hunter. 2010. Edge effects and the impact of non-protected areas in  
340 carnivore conservation: leopards in the Phinda-Mkhuze Complex, South Africa. *Animal*  
341 *conservation* 13: 315–323. doi:10.1111/j.1469-1795.2009.00342.x.

- 342 Barbosa, A. M., D. Fontaneto, L. Marini, and M. Pautasso. 2010. Positive regional species–people  
343 correlations: a sampling artefact or a key issue for sustainable development? *Animal Conservation*  
344 13: 446–447. doi:10.1111/j.1469-1795.2010.00402.x.
- 345 Barrows, C. W., M. B. Swartz, W. L. Hodges, M. F. Allen, J. T. Rotenberry, B.-L. Li, T. A. Scott, and X.  
346 Chen. 2005. A framework for monitoring multiple-species conservation plans. *Journal of wildlife*  
347 *diseases* 69: 1333–1345. doi:10.2193/0022-541X(2005)69[1333:AFFMMC]2.0.CO;2.
- 348 Bateman, P. W., and P. A. Fleming. 2012. Big city life: carnivores in urban environments. *Journal of*  
349 *Zoology* 28: 1–23. doi:10.1111/j.1469-7998.2011.00887.x.
- 350 Blignaut, C, Steenkamp, G, Hewlett, J, Loock, D, Emslie, R, Zeiler, G E. 2018. Preliminary findings of  
351 free-ranging serval (*Leptailurus serval*) chemical capture.
- 352 Bowland, J. M. 1990. Diet, home range and movement patterns of serval on farmland in Natal.
- 353 Cardillo, M., A. Purvis, W. Sechrest, J. L. Gittleman, J. Bielby, and G. M. Mace. 2004. Human  
354 population density and extinction risk in the world’s carnivores. *PLoS Biology* 2: E197.  
355 doi:10.1371/journal.pbio.0020197.
- 356 Chapin, F. S., E. S. Zavaleta, V. T. Eviner, R. L. Naylor, P. M. Vitousek, H. L. Reynolds, D. U. Hooper,  
357 S. Lavorel, et al. 2000. Consequences of changing biodiversity. *Nature* 405: 234–242.  
358 doi:10.1038/35012241.
- 359 Dixon, M. J. R., J. Loh, N. C. Davidson, C. Beltrame, R. Freeman, and M. Walpole. 2016. Tracking  
360 global change in ecosystem area: The Wetland Extent Trends index. *Biological conservation* 193:  
361 27–35. doi:10.1016/j.biocon.2015.10.023.
- 362 Edwards, D. P., S. Sloan, L. Weng, P. Dirks, J. Sayer, and W. F. Laurance. 2014. Mining and the African  
363 Environment. *Conservation Letters* 7: 302–311. doi:10.1111/conl.12076.

- 364 Efford, M. 2004. Density estimation in live-trapping studies. *Oikos* 106: 598–610. doi:10.1111/j.0030-  
365 1299.2004.13043.x.
- 366 Efford, M. G. 2017. *secr: spatially explicit capture-recapture models. R package version 3.1.3. Available*  
367 *from <https://cran.R-project.org/package=secr>.*
- 368 Ellis, E. C., K. Klein Goldewijk, S. Siebert, D. Deborah Lightman, and N. Ramankutty. 2010.  
369 Anthropogenic transformation of the biomes, 1700 to 2000. *Global ecology and Biogeography* 19:  
370 589–606. doi:10.1111/j.1466-8238.2010.00540.x/full.
- 371 Ellis, E. C., J. O. Kaplan, D. Q. Fuller, S. Vavrus, K. Klein Goldewijk, and P. H. Verburg. 2013. Used  
372 planet: a global history. *Proceedings of the National Academy of Sciences* 110: 7978–7985.  
373 doi:10.1073/pnas.1217241110.
- 374 Finer, M., and C. N. Jenkins. 2012. Proliferation of hydroelectric dams in the Andean Amazon and  
375 implications for Andes-Amazon connectivity. *PLoS One* 7: e35126.  
376 doi:10.1371/journal.pone.0035126.
- 377 Friedmann, Y., and B. Daly. 2004. *Red data book of the mammals of South Africa: a conservation*  
378 *assessment*. Johannesburg: Endangered Wildlife Trust.
- 379 Fuller, T., S. Destefano, and P. S. Warren. 2010. Carnivore behavior, ecology and relationship to  
380 urbanization. In *Urban Carnivores: Ecology, Conflict, and Conservation*, ed. S. D. Gehrt, S. P. D.  
381 Riley, and B. L. Cypher, 13–20. Baltimore: Johns Hopkins University Press.
- 382 Geertsema, A. A. 1985. Aspects of the ecology of the serval *Leptailurus serval* in the Ngorongoro Crater,  
383 Tanzania. *Netherlands Journal of Zoology* 35: 527–610. doi:10.1163/002829685X00217.
- 384 Google. 2014. Satellite imagery. Sources: CNES/Airbus. Image date 01 May 2014. Accessed May 10,  
385 2014. Available from <https://www.google.co.za/maps>.



- 386 Harris, N. C., M. J. Kauffman, and L. S. Mills. 2008. Inferences about ungulate population dynamics  
387 derived from age ratios. *Journal of wildlife management* 72: 1143–1151. doi:10.2193/2007-277.
- 388 Henley, S. 1997. *On the proposed reintroduction of serval (Felis serval) into the Great Fish River*  
389 *Reserve, Eastern Cape*. Port Elizabeth: University of Port Elizabeth.
- 390 Hobbs, R. J., S. Arico, J. Aronson, J. S. Baron, P. Bridgewater, V. A. Cramer, P. R. Epstein, J. J. Ewel, et  
391 al. 2006. Novel ecosystems: theoretical and management aspects of the new ecological world order.  
392 *Global Ecology and Biogeography* 15: 1–7. doi:10.1111/j.1466-822X.2006.00212.x.
- 393 Houser, A., M. J. Somers, and L. K. Boast. 2009. Home Range Use of Free-Ranging Cheetah on Farm  
394 and Conservation Land in Botswana. *South African Journal of Wildlife Research* 39: 11–22.  
395 doi:10.3957/056.039.0102.
- 396 Ibisch, P. L., M. T. Hoffmann, S. Kreft, G. Pe'er, V. Kati, L. Biber-Freudenberger, D. A. DellaSala, M.  
397 M. Vale, et al. 2016. A global map of roadless areas and their conservation status 354: 1423–1427.  
398 doi:10.1126/science.aaf7166.
- 399 Jackson, C. R., R. J. Power, R. J. Groom, E. H. Masenga, E. E. Mjingo, R. D. Fyumagwa, E. Røskaft, and  
400 H. Davies-Mostert. 2014. Heading for the hills: risk avoidance drives den site selection in African  
401 wild dogs. *PLoS One* 9: e99686. doi:10.1371/journal.pone.0099686.
- 402 Jenkins, A. R., J. J. Smallie, and M. Diamond. 2010. Avian collisions with power lines: a global review of  
403 causes and mitigation with a South African perspective. *Bird conservation international* 20.  
404 Cambridge University Press: 263–278. doi:10.1017/S0959270910000122.
- 405 Kamler, J. F., H. T. Davies-Mostert, L. Hunter, and D. W. Macdonald. 2007. Predation on black-backed  
406 jackals (*Canis mesomelas*) by African wild dogs (*Lycaon pictus*). *African Journal of Ecology* 45:  
407 667–668. doi:10.1111/j.1365-2028.2007.00768.x.

- 408 Kingdon, J., and M. Hoffmann, ed. 2012. *Mammals of Africa*. New York: Bloomsbury.
- 409 Laurance, W. F., M. Goosem, and S. G. W. Laurance. 2009. Impacts of roads and linear clearings on  
410 tropical forests. *Trends in Ecology & Evolution* 24: 659–669. doi:10.1016/j.tree.2009.06.009.
- 411 Laurance, W. F., A. Peletier-Jellema, B. Geenen, H. Koster, P. Verweij, P. Van Dijck, T. E. Lovejoy, J.  
412 Schleicher, et al. 2015. Reducing the global environmental impacts of rapid infrastructure expansion.  
413 *Current Biology* 25: R259–62. doi:10.1016/j.cub.2015.02.050.
- 414 Linström, A. 2012. *Sasol: Secunda wetland study*. Wet Earth Eco-Specs, Lydenburg.
- 415 Loock, D., S. Williams, K. Emslie, M. Somers, W. S. Matthews, and L. Swanepoel. 2018. Serval  
416 (*Leptailurus serval*) camera trap and live trap dataset at Secunda, South Africa. Figshare. Accessed  
417 12 Jan 2018. Available from <https://figshare.com/s/bec3a5d725d8c11a5842>.  
418 doi:10.6084/m9.figshare.5729124.
- 419 Marnewick, K., A. Beckhelling, D. Cilliers, E. Lane, G. Mills, K. Herring, P. Caldwell, R. Hall, et al.  
420 2007. The status of the cheetah in South Africa. *Cat News* Special Issue 3 – Cheetahs in Southern  
421 Africa: 22–31.
- 422 Matthews, W. S. 2016. *Baseline assessment of state of terrestrial flora for the 'secondary area' of the*  
423 *SASOL Secunda site. Part of the state of biodiversity assessment – WetEarth*. WSM Eco Services,  
424 Nelspruit.
- 425 McGregor, H W, Hampton J O, Lisle, D, Legge, S. 2016. Live-capture of feral cats using tracking dogs  
426 and darting, with comparisons to leg-hold trapping. *Wildlife Research* 43: 313–322.  
427 doi:10.1071/WR15134.
- 428 McKinney, M. L. 2002. Urbanization, biodiversity, and conservation: the impacts of urbanization on  
429 native species are poorly studied, but educating a highly urbanized human population about these

- 430 impacts can greatly improve species conservation in all ecosystems. *BioScience* 52: 883–890.  
431 doi:10.1641/0006-3568(2002)052[0883:UBAC]2.0.CO;2.
- 432 Michalski, F., P. G. Crawshaw Jr, T. G. de Oliveira, and M. E. Fabián. 2007. Efficiency of box-traps and  
433 leg-hold traps with several bait types for capturing small carnivores (Mammalia) in a disturbed area  
434 of southeastern Brazil. *Revista de Biologia Tropical* 55. scielo.sa.cr: 315–320.
- 435 Molsher, R. L. 2001. Trapping and demographics of feral cats (*Felis catus*) in central New South Wales.  
436 *Wildlife Research* 28: 631–636. doi:10.1071/WR00027.
- 437 Morris-Drake, A., A. M. Bracken, and J. M. Kern. 2017. Anthropogenic noise alters dwarf mongoose  
438 responses to heterospecific alarm calls. *Environmental Pollution* . Elsevier.
- 439 Mucina, L., and M. C. Rutherford. 2006. *The vegetation of South Africa, Lesotho and Swaziland*. Pretoria:  
440 South African National Biodiversity Institute.
- 441 Northrup, J. M., and G. Wittemyer. 2013. Characterising the impacts of emerging energy development on  
442 wildlife, with an eye towards mitigation. *Ecology Letters* 16: 112–125. doi:10.1111/ele.12009.
- 443 Pautasso, M., K. Böhning-Gaese, P. Clergeau, V. R. Cueto, M. Dinetti, E. Fernández-Juricic, M.-L.  
444 Kaisanlahti-Jokimäki, J. Jokimäki, et al. 2011. Global macroecology of bird assemblages in  
445 urbanized and semi-natural ecosystems. *Global Ecology and Biogeography* 20: 426–436.  
446 doi:10.1111/j.1466-8238.2010.00616.x.
- 447 Raiter, K. G., H. P. Possingham, S. M. Prober, and R. J. Hobbs. 2014. Under the radar: mitigating  
448 enigmatic ecological impacts. *Trends in Ecology & Evolution* 29: 635–644.  
449 doi:10.1016/j.tree.2014.09.003.
- 450 Ramesh, T., and C. T. Downs. 2015/2. Impact of land use on occupancy and abundance of terrestrial  
451 mammals in the Drakensberg Midlands, South Africa. *Journal for Nature Conservation* 23: 9–18.

- 452 doi:10.1016/j.jnc.2014.12.001.
- 453 Ramesh, T., and C. T. Downs. 2013. Impact of farmland use on population density and activity patterns  
454 of serval in South Africa. *Journal of Mammalogy* 94: 1460–1470. doi:10.1644/13-MAMM-A-063.1.
- 455 Ramesh, T., and C. T. Downs. 2015. Diet of serval (*Leptailurus serval*) on farmlands in the Drakensberg  
456 Midlands, South Africa. *Mammalia*. doi:10.1515/mammalia-2014-0053.
- 457 Ramesh, T., R. Kalle, and C. T. Downs. 2015. Sex-specific indicators of landscape use by servals:  
458 Consequences of living in fragmented landscapes. *Ecological Indicators* 52: 8–15.  
459 doi:10.1016/j.ecolind.2014.11.021.
- 460 Ramesh, T., R. Kalle, and C. T. Downs. 2016. Spatiotemporal variation in resource selection of servals:  
461 insights from a landscape under heavy land-use transformation. *Journal of Mammalogy* 97: 554–  
462 567. doi:10.1093/jmammal/gyv201.
- 463 R Development Core Team. 2017. *R: A language and environment for statistical computing*. . Version  
464 3.4.3. R Foundation for statistical computing, Vienna. Available from <https://www.R-project.org/>.
- 465 Ripple, W. J., J. A. Estes, R. L. Beschta, C. C. Wilmers, E. G. Ritchie, M. Hebblewhite, J. Berger, B.  
466 Elmhagen, et al. 2014. Status and ecological effects of the world’s largest carnivores. *Science* 343:  
467 1241484–1241484. doi:10.1126/science.1241484.
- 468 Ritchie, E. G., and C. N. Johnson. 2009. Predator interactions, mesopredator release and biodiversity  
469 conservation. *Ecology letters* 12: 982–998. doi:10.1111/j.1461-0248.2009.01347.x.
- 470 Sax, D. F., and S. D. Gaines. 2003. Species diversity: from global decreases to local increases. *Trends in*  
471 *Ecology & Evolution* 18: 561–566. doi:10.1016/S0169-5347(03)00224-6.
- 472 Scott, D. M., M. J. Berg, B. A. Tolhurst, A. L. M. Chauvenet, G. C. Smith, K. Neaves, J. Lochhead, and  
473 P. J. Baker. 2014. Changes in the distribution of red foxes (*Vulpes vulpes*) in urban areas in Great

- 474 Britain: findings and limitations of a media-driven nationwide survey. *PLoS One* 9: e99059.  
475 doi:10.1371/journal.pone.0099059.
- 476 Skinner, J. D., and C. T. Chimimba. 2005. *The Mammals of the Southern African Sub-region*.  
477 doi:10.1017/cbo9781107340992.
- 478 Sloan, S., B. Bertzky, and W. F. Laurance. 2016. African development corridors intersect key protected  
479 areas. *African Journal of Ecology* 55: 731–737. doi:10.1111/aje.12377.
- 480 Smallie, J. J., and T. G. O’connor. 2000. Elephant utilization of *Colophospermum mopane*: possible  
481 benefits of hedging. *African Journal of Ecology* 38: 352–359. doi:10.1046/j.1365-  
482 2028.2000.00258.x.
- 483 Sollmann, R., M. M. Furtado, B. Gardner, H. Hofer, A. T. A. Jácomo, N. M. Tôrres, and L. Silveira.  
484 2011/3. Improving density estimates for elusive carnivores: Accounting for sex-specific detection  
485 and movements using spatial capture–recapture models for jaguars in central Brazil. *Biological*  
486 *Conservation* 144: 1017–1024.
- 487 Sunquist, M., and F. Sunquist. 2002. *Wild Cats of the World*. University of Chicago Press.
- 488 Taylor, P. J. 2013. *Otomys irroratus* Southern African vlei rat. In *Mammals of Africa: Rodents, Hares*  
489 *and Rabbits*, ed. D. C. D. Happold, 583–585. London: Bloomsbury.  
490 doi:10.5040/9781472926937.0355.
- 491 Thiel, C. 2011. Ecology and population status of the Serval *Leptailurus serval* (Schreber, 1776) in  
492 Zambia. PhD Thesis,. University of Bonn, Bonn.
- 493 Thiel, C. 2015. *Leptailurus serval*. *The IUCN Red List of Threatened Species 2015: e.T11638A50654625*.  
494 doi:10.2305/IUCN.UK.2015-2.RLTS.T11638A50654625.en.
- 495 Tobler, M. W., and G. V. N. Powell. 2013. Estimating jaguar densities with camera traps: Problems with

- 496 current designs and recommendations for future studies. *Biological Conservation* 159: 109–118.  
497 doi:10.1016/j.biocon.2012.12.009.
- 498 United Nations Environment Programme. 2012. *Global environmental outlook 5: environment for the*  
499 *future we want*. United Nations Environment Programme, Valletta.
- 500 de Wet, F. 2016. *Veld condition assessment and management within Sasol grasslands*. EnviroPulse,  
501 Hilton.
- 502 Wiesel, I. 2010. Killing of Cape fur seal (*Arctocephalus pusillus pusillu*) pups by brown hyenas  
503 (*Parahyaena brunnea*) at mainland breeding colonies along the coastal Namib Desert. *Acta*  
504 *Ethologica* 13: 93–100. doi:10.1007/s10211-010-0078-1.
- 505 Williams, N., M. W. Schwartz, and P. A. Vesk. 2009. A conceptual framework for predicting the effects  
506 of urban environments on floras. *Journal of Ecology* 97: 4–9. doi: 10.1111/j.1365-  
507 2745.2008.01460.x.
- 508 Williams, S. T., N. Maree, P. Taylor, S. R. Belmain, M. Keith, and L. H. Swanepoel. 2018. Predation by  
509 small mammalian carnivores in rural agro-ecosystems: An undervalued ecosystem service?  
510 *Ecosystem Services*. doi:10.1016/j.ecoser.2017.12.006.
- 511 Zarfl, C., A. E. Lumsdon, J. Berlekamp, L. Tydecks, and K. Tockner. 2014. A global boom in  
512 hydropower dam construction. *Aquatic Sciences* 77: 161–170. doi:10.1007/s00027-014-0377-0.
- 513

514 **Supplementary information**

515

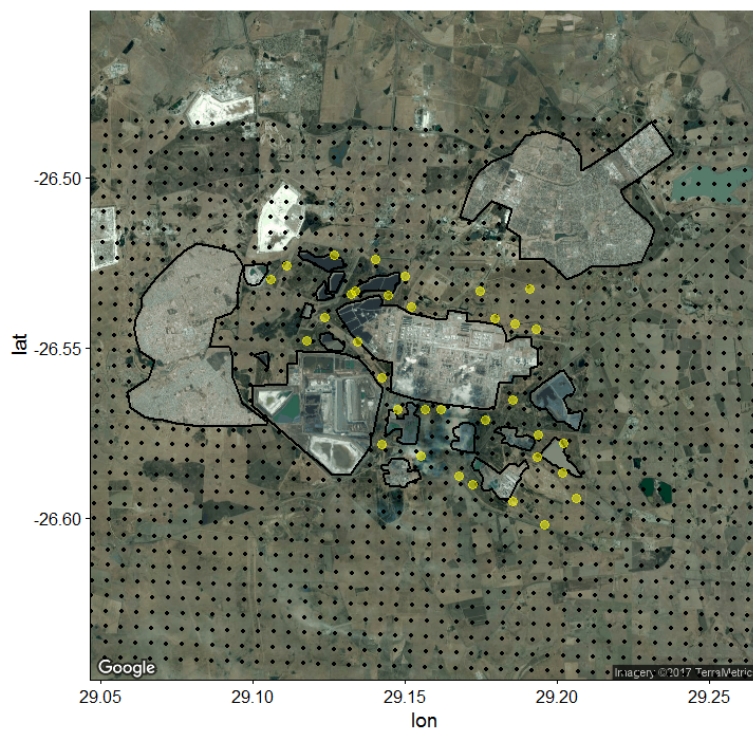

517 Fig. S1. Map showing the locations of camera traps (yellow points) and the state space (black  
518 points), illustrating the areas excluded from the state space at SSOP in South Africa.

519

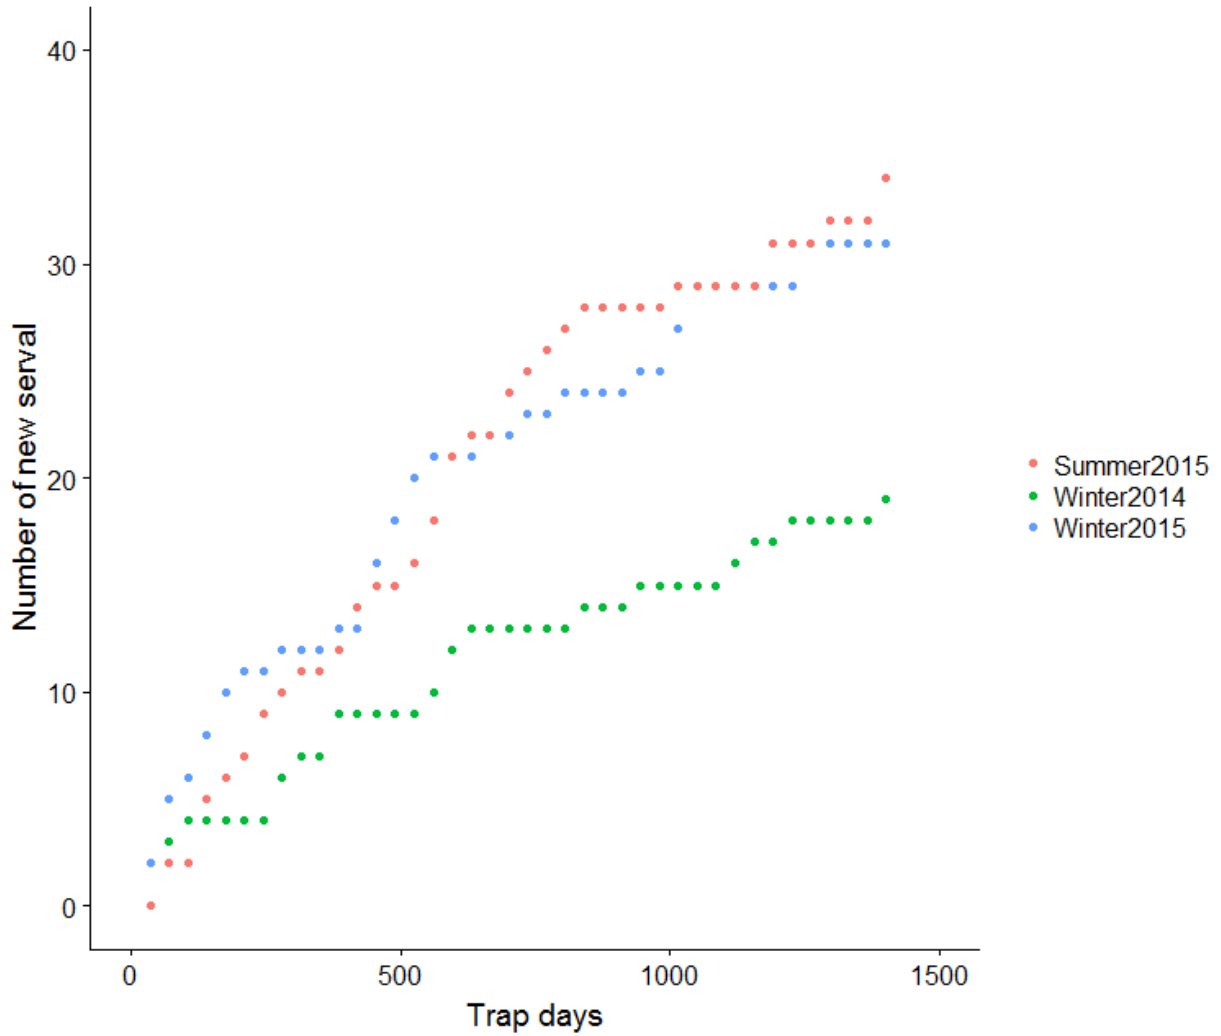

520

521 Fig. S2. Cumulative frequency curve showing the relationship between the cumulative number of  
522 individual serval identified on the camera traps at SSO in South Africa.

523

524



525

526

527 Table S3. Model results showing the seasonal effect on serval density at SSO.

|                        | <b>Density<br/>(individuals per<br/>100 km<sup>2</sup>)</b> | <b>Standard error</b> | <b>Lower confidence<br/>limit</b> | <b>Upper confidence<br/>limit</b> |
|------------------------|-------------------------------------------------------------|-----------------------|-----------------------------------|-----------------------------------|
| <b>Winter 2014</b>     | 111.54                                                      | 22.76                 | 75.07                             | 165.72                            |
| <b>Winter 2015</b>     | 103.06                                                      | 21.76                 | 68.44                             | 155.19                            |
| <b>Summer<br/>2015</b> | 62.33                                                       | 16.02                 | 37.96                             | 102.35                            |

528

529

530

531

532

533 Table S4. Model results showing the habitat effect on detection probability (g0). Model name: a) (Mhab.sec) models the detection  
534 probability (g0) on habitat type; b) (Mdens.habitat) models the how density is affected by season and year and account for habitat in  
535 detection probability; c) (Mb.sec) models the learned response to detection; d) (Mseason) models density affected by season and year;  
536 e) (m0.sec) null model.

| Model name    | Model specification                    | Detection Function (detectfn) | Number of parameters (npar) | Log-Likelihood (logLik) | Akaike Information Criterion(AIC) | Corrected AIC (AICc) | Difference in Corrected AIC (dAICc) | AICc model weight (AICcwt) |
|---------------|----------------------------------------|-------------------------------|-----------------------------|-------------------------|-----------------------------------|----------------------|-------------------------------------|----------------------------|
| Mhab.sec      | D~1<br>g0~Habitat<br>sigma~1 z~1       | hazard rate                   | 7                           | -1015.43                | 2044.854                          | 2046.327             | 0                                   | 0.5122                     |
| Mdens.habitat | D~session<br>g0~Habitat<br>sigma~1 z~1 | hazard rate                   | 9                           | -1013                   | 2043.993                          | 2046.425             | 0.098                               | 0.4878                     |
| Mb.sec        | D~1 g0~b<br>sigma~1 z~1                | hazard rate                   | 5                           | -1028.51                | 2067.03                           | 2067.799             | 21.472                              | 0                          |
| Mseason       | D~session<br>g0~1 sigma~1<br>z~1       | hazard rate                   | 6                           | -1030.09                | 2072.179                          | 2073.269             | 26.942                              | 0                          |
| M0.sec        | D~1 g0~1<br>sigma~1 z~1                | hazard rate                   | 4                           | -1033.59                | 2075.185                          | 2075.692             | 29.365                              | 0                          |
